# Supplementary material for: A possible mechanism for combined arsenic and fluoride induced cellular and DNA damage in mice
Source: Royal Society of Chemistry journal article supplement (doi:10.1039/c1mt00118c), 2011-10-10
Supplement: c1mt00118c.pdf [file c1mt00118c.pdf]

**Suppl 1** Characteristics IR spectra ( $\text{cm}^{-1}$ ) of normal and exposed liver tissue  
(A) Normal (B) Arsenic (C) Fluoride (D) Arsenic+fluoride

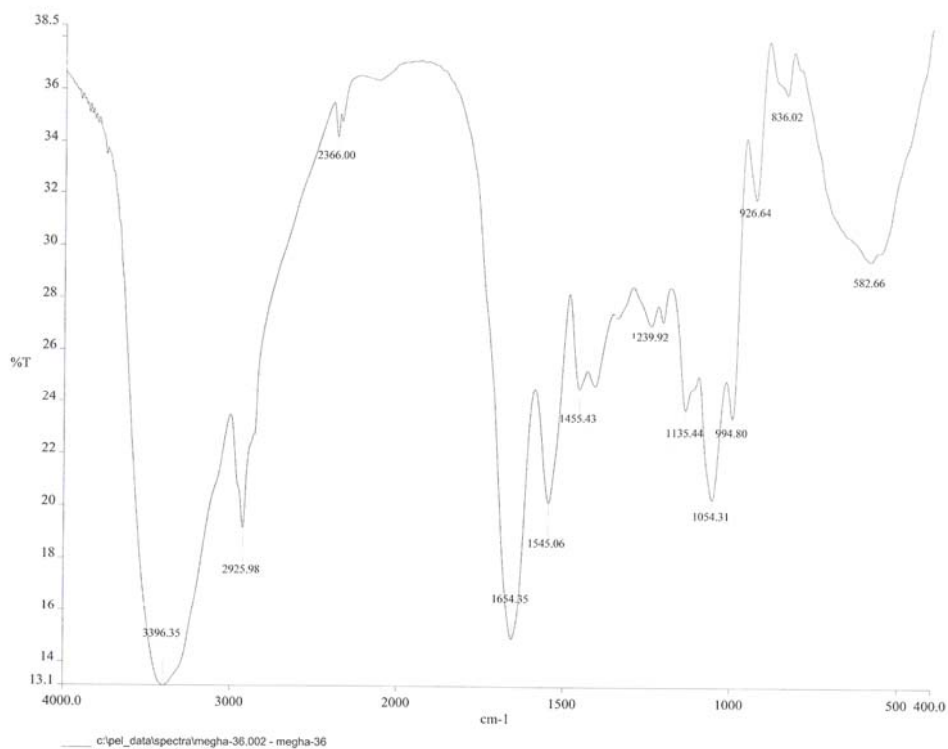

Suppl 1A

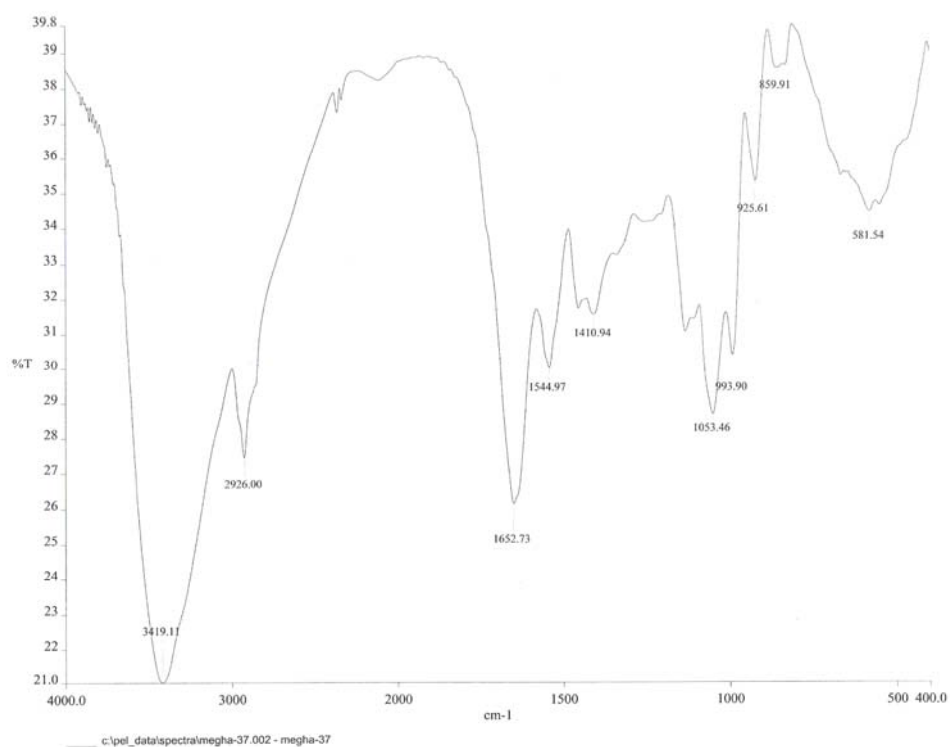

Suppl 1B

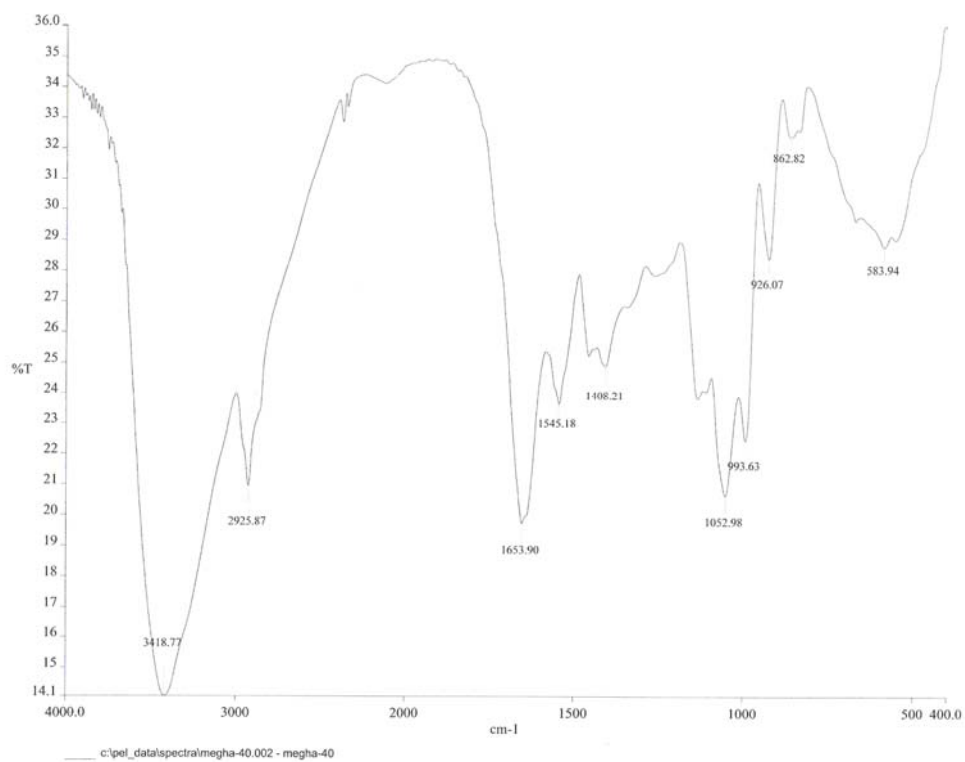

Suppl 1C

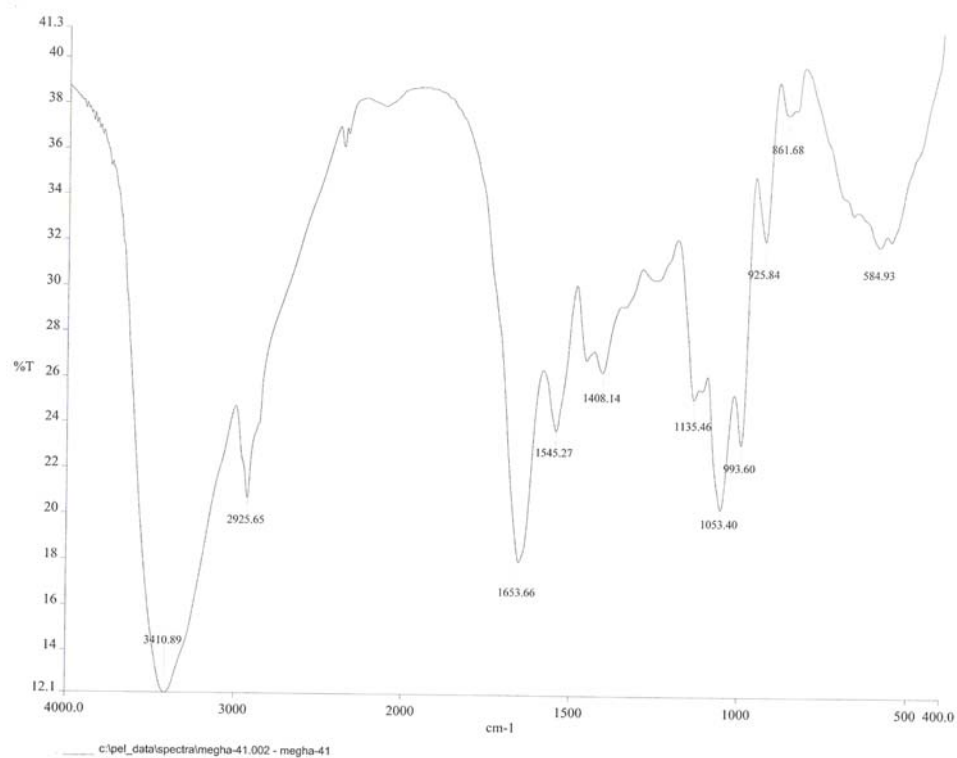

Suppl 1D

**Suppl 2** Infrared spectra of brain tissue of arsenic and/or fluoride exposed animals.  
(A) Normal (B) Arsenic (C) Fluoride (D) Arsenic+fluoride

---

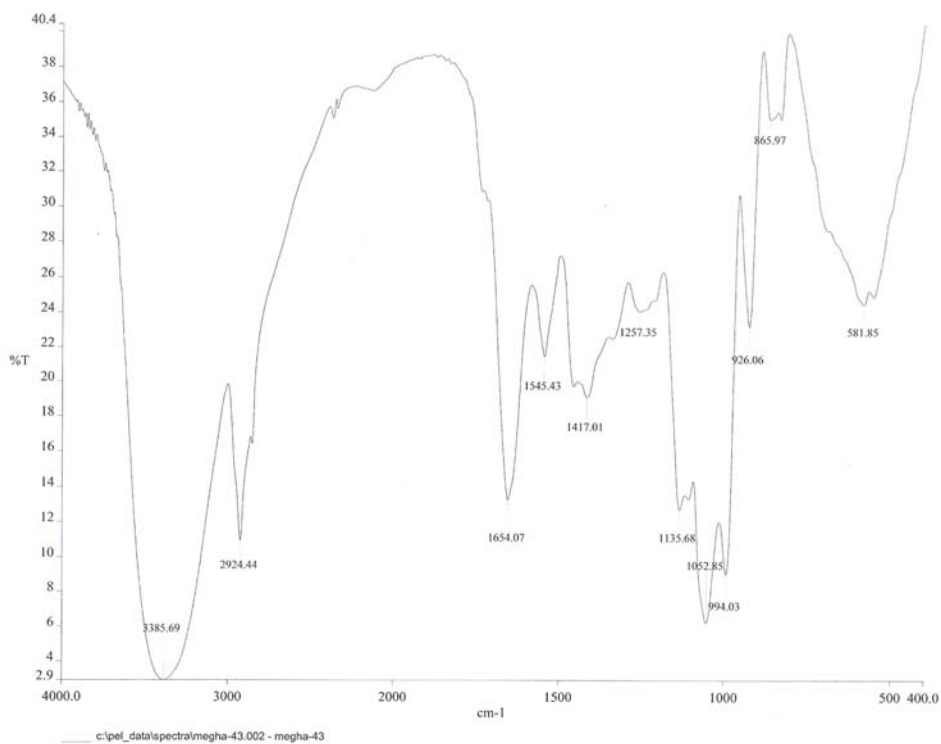

Suppl 2A

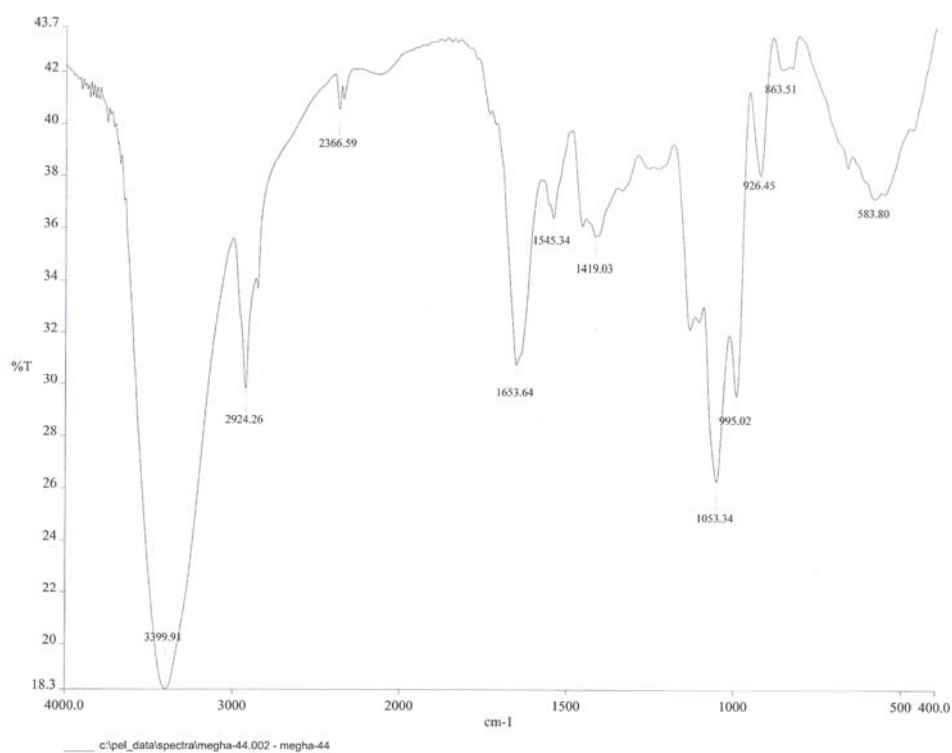

Suppl 2B

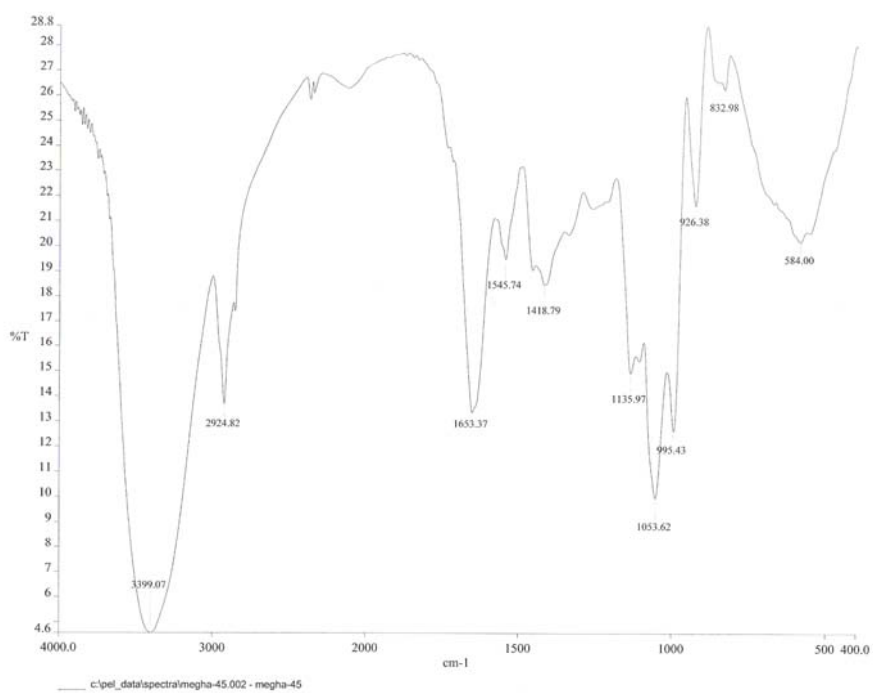

Suppl 2C

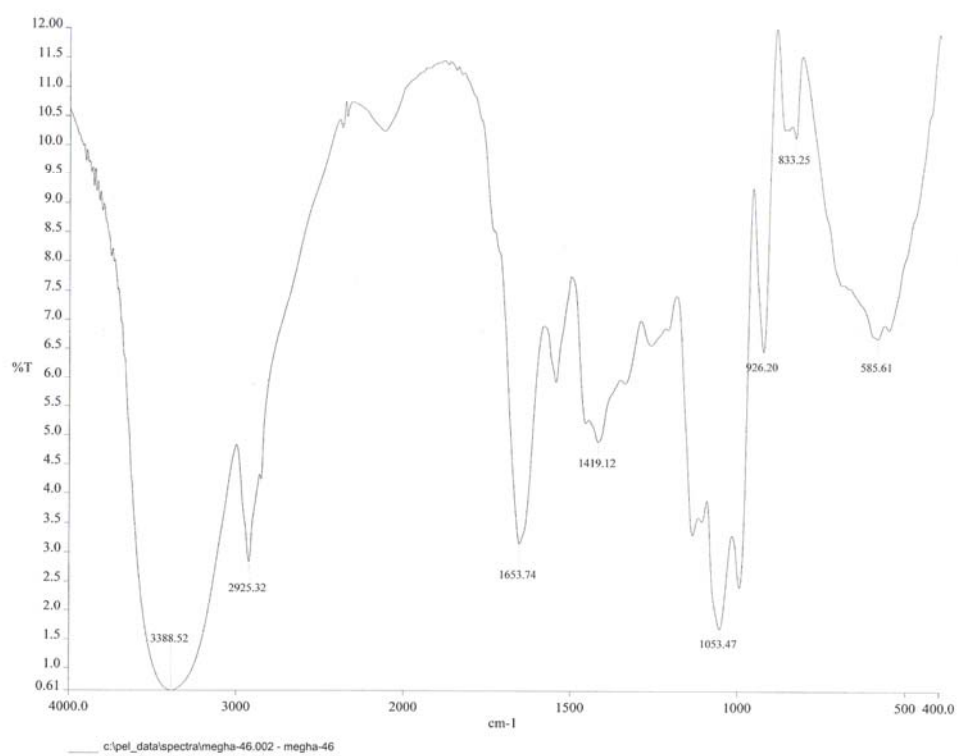

Suppl 2D
